# Supplementary material for: Molecular Regulation of Heme Oxygenase-1 Expression by E2F Transcription Factor 2 in Lung Fibroblast Cells: Relevance to Idiopathic Pulmonary Fibrosis
Source: Biomolecules. 2022 Oct 21;12(10):1531. doi: 10.3390/biom12101531 (PMC9599643; doi:10.3390/biom12101531)
Supplement: Supplementary file 1 [file biomolecules-12-01531-s001.zip › biomolecules-1868316-supplementary.pdf]

## Supplemental materials

### Molecular Regulation of Heme Oxygenase 1 Expression by E2F Transcription Factor 2 in Lung Fibroblast Cells: Relevance to Idiopathic Pulmonary Fibrosis

Qinmao Ye <sup>1</sup>, Sarah J Taleb <sup>1</sup>, Heather Wang <sup>1</sup>, Narasimham L Parinandi <sup>1</sup>, Daniel J Kass <sup>2</sup>,  
Mauricio Rojas <sup>3</sup>, Cankun Wang <sup>4</sup>, Qin Ma <sup>4</sup>, Zhao Jing <sup>1,3</sup>, Zhao Yutong <sup>1,3#</sup>

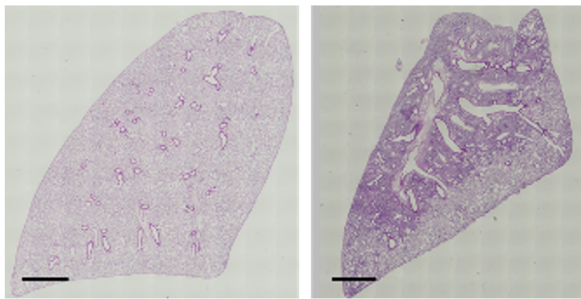

**Supplemental Figure S1. Bleomycin induces lung fibrosis.** C57BL/6 mice were intratracheal injection with bleomycin. After 3 weeks, lung tissues were subjected to H&E staining. Scale bar, 1 mm.

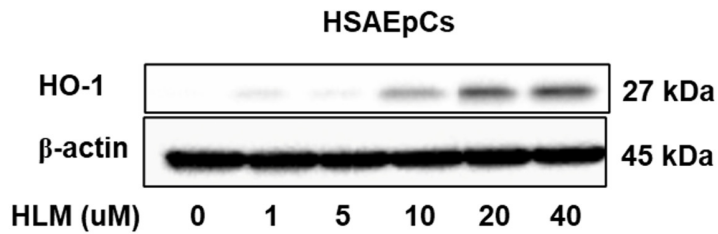

**Supplemental Figure S2. HLM006474 increases HO-1 levels in HSAEpCs.** HSAEpCs were treated with HLM in different concentrations for 24 hours and HO-1 and  $\beta$ -actin protein levels were analyzed by immunoblotting (n=2).

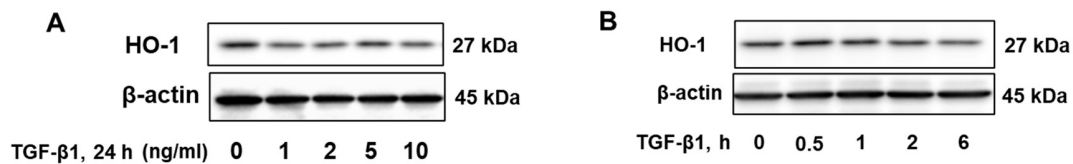

**Supplemental Figure S3. HMOX1 upregulation is not through TGF- $\beta$ 1 stimulation.** Human lung fibroblast cells (CCL-210) were stimulated with TGF- $\beta$ 1 in different doses (**A**) and time points (**B**). Cell lysates were examined by immunoblotting with HO-1 and  $\beta$ -actin antibodies (n=3).
